# Supplementary material for: Determining the safety and effectiveness of Tai Chi: a critical overview of 210 systematic reviews of controlled clinical trials
Source: PubMed Central journal article supplement (PMC9719113; doi:10.1186/s13643-022-02100-5), 2022-12-03
Supplement: 13643_2022_2100_MOESM5_ESM.pdf [file 13643_2022_2100_MOESM5_ESM.pdf]

## Additional file 5: AMSTAR 2 quality rating of systematic reviews

| Review ID           | PICO research question<br>1 | Protocol<br>2 | Study design inclusion rationale<br>3 | Comprehensive literature search<br>4 | Duplicate study selection<br>5 | Duplicate data extraction<br>6 | List excluded articles + rationale<br>7 | Adequate study characteristics<br>8 | Satisfactory RoB assessment<br>9 | Funding source of studies<br>10 | Appropriate meta-analysis<br>11 | Study RoB impact on meta-analysis<br>12 | Study RoB impact on conclusions<br>13 | Heterogeneity explained, discussed<br>14 | Publication bias assessed, discussed<br>15 | Conflict of interest, funding declared<br>16 | Modified AMSTAR 2<br>Quality Rating *<br>(Sensitivity analysis **) |
|---------------------|-----------------------------|---------------|---------------------------------------|--------------------------------------|--------------------------------|--------------------------------|-----------------------------------------|-------------------------------------|----------------------------------|---------------------------------|---------------------------------|-----------------------------------------|---------------------------------------|------------------------------------------|--------------------------------------------|----------------------------------------------|--------------------------------------------------------------------|
| Buto 2020 [60]      | Y                           | PY            | PY                                    | PY                                   | Y                              | Y                              | N                                       | Y                                   | PY                               | N                               | n/a                             | n/a                                     | Y                                     | n/a                                      | Y                                          | Y                                            | Moderate (Low)                                                     |
| Cheng 2019 [61]     | Y                           | PY            | PY                                    | PY                                   | N                              | Y                              | N                                       | Y                                   | Y                                | N                               | Y                               | N                                       | Y                                     | Y                                        | N                                          | Y                                            | Low (Critically low)                                               |
| Choo 2020 [62]      | Y                           | N             | PY                                    | Y                                    | Y                              | Y                              | Y                                       | Y                                   | Y                                | Y                               | Y                               | Y                                       | N                                     | Y                                        | Y                                          | Y                                            | Critically low                                                     |
| Cocchiara 2020 [63] | Y                           | N             | N                                     | PY                                   | Y                              | Y                              | N                                       | Y                                   | PY                               | N                               | n/a                             | n/a                                     | N                                     | n/a                                      | n/a                                        | Y                                            | Critically low                                                     |
| Cui 2019 [64]       | Y                           | N             | PY                                    | PY                                   | Y                              | Y                              | N                                       | Y                                   | Y                                | N                               | Y                               | Y                                       | Y                                     | Y                                        | N                                          | Y                                            | Critically low                                                     |
| Dong 2020 [65]      | Y                           | PY            | PY                                    | PY                                   | Y                              | Y                              | N                                       | PY                                  | Y                                | N                               | N <sup>a</sup>                  | N                                       | N                                     | Y                                        | Y                                          | Y                                            | Critically low                                                     |
| Gu 2017 [66]        | Y                           | N             | PY                                    | PY                                   | N                              | Y                              | PY                                      | Y                                   | Y                                | N                               | Y                               | Y                                       | Y                                     | Y                                        | Y                                          | Y                                            | Low (Critically low)                                               |
| Guo 2020 [67]       | Y                           | N             | PY                                    | PY                                   | Y                              | Y                              | Y                                       | Y                                   | Y                                | N                               | Y                               | Y                                       | Y                                     | Y                                        | Y                                          | Y                                            | Low                                                                |
| Hall 2017 [68]      | Y                           | N             | PY                                    | PY                                   | N                              | Y                              | PY                                      | Y                                   | Y                                | Y                               | Y                               | Y                                       | Y                                     | Y                                        | Y                                          | N                                            | Low (Critically low)                                               |
| Ho 2013 [69]        | Y                           | N             | Y                                     | PY                                   | N                              | Y                              | PY                                      | Y                                   | PY                               | N                               | n/a                             | n/a                                     | Y                                     | n/a                                      | n/a                                        | Y                                            | Low (Critically low)                                               |
| Hu 2020 [70]        | Y                           | N             | PY                                    | PY                                   | Y                              | Y                              | N                                       | Y                                   | Y                                | N                               | Y                               | Y                                       | Y                                     | Y                                        | Y                                          | Y                                            | Low (Critically low)                                               |
| Huang 2017 [73]     | Y                           | N             | PY                                    | Y                                    | Y                              | Y                              | PY                                      | Y                                   | Y                                | N                               | Y                               | Y                                       | Y                                     | Y                                        | Y                                          | Y                                            | Low (Critically low)                                               |
| Huang 2019 [72]     | Y                           | N             | -N                                    | PY                                   | Y                              | Y                              | N                                       | Y                                   | PY                               | N                               | n/a                             | n/a                                     | Y                                     | n/a                                      | n/a                                        | Y                                            | Low (Critically low)                                               |
| Huang 2020 [71]     | Y                           | Y             | PY                                    | Y                                    | Y                              | Y                              | N                                       | Y                                   | Y                                | Y                               | N <sup>b</sup>                  | N                                       | N                                     | Y                                        | Y                                          | Y                                            | Critically low                                                     |

Yang GY, Hunter J, Bu FL, Hao WL, Zhang H, Wayne PM, Liu JP. Determining the safety and effectiveness of Tai Chi: a critical overview of 210 systematic reviews of controlled clinical trials. *Systematic Reviews* 2022.

|                         |   |   |    |    |   |   |    |    |    |   |                |     |   |     |     |   |                               |
|-------------------------|---|---|----|----|---|---|----|----|----|---|----------------|-----|---|-----|-----|---|-------------------------------|
| Jiang 2018 [74]         | Y | N | PY | PY | Y | Y | PY | PY | Y  | N | Y              | N   | Y | N   | Y   | N | Low ( <i>Critically low</i> ) |
| Kruisbrink 2020 [75]    | Y | Y | PY | PY | Y | Y | N  | PY | Y  | N | Y              | N   | N | Y   | Y   | Y | Low ( <i>Critically low</i> ) |
| Liu F 2020 [76]         | Y | N | N  | PY | Y | Y | N  | Y  | PY | N | N <sup>c</sup> | N   | Y | Y   | N   | Y | Critically low                |
| Liu LZ 2020 [77]        | Y | N | PY | PY | Y | Y | N  | Y  | PY | N | Y              | N   | N | Y   | N   | Y | Critically low                |
| Liu WJ 2020 [78]        | Y | N | PY | PY | N | N | N  | PY | Y  | N | N <sup>d</sup> | N   | N | Y   | Y   | N | Critically low                |
| Luo 2020 [79]           | Y | Y | PY | PY | N | Y | N  | Y  | Y  | N | Y              | Y   | Y | Y   | Y   | Y | Moderate ( <i>Low</i> )       |
| Lyu 2018 [81]           | Y | Y | PY | PY | Y | N | PY | Y  | Y  | N | Y              | Y   | Y | Y   | Y   | Y | Moderate ( <i>Low</i> )       |
| Lyu 2020 [80]           | Y | Y | PY | Y  | Y | Y | N  | Y  | Y  | Y | Y              | Y   | Y | Y   | Y   | Y | Moderate ( <i>Low</i> )       |
| Mudano 2019 [82]        | Y | Y | N  | Y  | Y | Y | Y  | Y  | Y  | Y | Y              | Y   | Y | Y   | Y   | Y | High                          |
| Ni 2019 [83]            | Y | N | PY | PY | Y | Y | N  | Y  | Y  | N | Y              | Y   | Y | Y   | Y   | Y | Low ( <i>Critically low</i> ) |
| Pan 2016 [84]           | N | N | PY | PY | Y | N | PY | Y  | PY | N | Y              | N   | Y | Y   | Y   | Y | Low ( <i>Critically low</i> ) |
| Qin 2019 [85]           | Y | Y | PY | PY | Y | Y | N  | Y  | PY | N | Y              | N   | N | Y   | Y   | Y | Low ( <i>Critically low</i> ) |
| Si 2020 [86]            | Y | Y | PY | PY | Y | Y | N  | Y  | PY | N | Y              | Y   | N | Y   | Y   | Y | Low ( <i>Critically low</i> ) |
| Song 2018 [87]          | Y | Y | PY | PY | Y | Y | PY | Y  | Y  | N | Y              | N   | N | Y   | Y   | Y | Low ( <i>Critically low</i> ) |
| Su 2020 [88]            | N | N | PY | N  | N | N | N  | Y  | Y  | N | Y              | N   | N | Y   | N   | Y | Critically low                |
| Taylor 2017 [89]        | N | N | Y  | PY | N | N | PY | Y  | PY | N | n/a            | n/a | Y | n/a | n/a | Y | Low ( <i>Critically low</i> ) |
| Taylor-Piliae 2020 [90] | Y | N | PY | PY | Y | Y | N  | Y  | PY | N | Y              | N   | N | N   | N   | Y | Critically low                |
| Wang 2010 [93]          | Y | N | PY | PY | N | Y | PY | PY | PY | N | Y              | Y   | N | Y   | N   | Y | Critically low                |
| Wang 2017 [92]          | Y | N | PY | PY | N | Y | PY | Y  | Y  | N | Y              | N   | N | Y   | Y   | Y | Critically low                |
| Wang 2020 [91]          | Y | N | PY | PY | Y | Y | N  | Y  | Y  | N | Y              | N   | N | Y   | N   | N | Critically low                |
| Wayne 2014 [94]         | Y | N | Y  | PY | Y | Y | PY | Y  | Y  | N | Y              | Y   | Y | Y   | N   | Y | Critically low                |
| Webster 2016 [95]       | Y | N | Y  | PY | N | N | PY | PY | N  | N | n/a            | n/a | Y | n/a | n/a | Y | Critically low                |
| Wu 2020 [96]            | Y | N | PY | PY | Y | Y | N  | Y  | Y  | N | Y              | Y   | Y | Y   | Y   | N | Low ( <i>Critically low</i> ) |
| Xiang 2017 [97]         | Y | Y | PY | Y  | Y | N | PY | Y  | Y  | N | Y              | Y   | Y | Y   | Y   | Y | Moderate ( <i>Low</i> )       |
| Yin 2014 [98]           | Y | N | PY | PY | N | Y | PY | PY | PY | N | Y              | Y   | Y | Y   | Y   | N | Low                           |
| Yu 2018 [100]           | Y | N | PY | PY | N | Y | PY | Y  | PY | N | Y              | N   | N | Y   | N   | Y | Critically low                |
| Yu 2019 [99]            | Y | N | PY | PY | Y | Y | N  | PY | Y  | N | N <sup>d</sup> | N   | Y | Y   | Y   | Y | Critically low                |
| Zhang 2019 [101]        | Y | Y | PY | PY | Y | Y | N  | Y  | Y  | N | Y              | Y   | Y | Y   | Y   | Y | Moderate ( <i>Low</i> )       |

Yang GY, Hunter J, Bu FL, Hao WL, Zhang H, Wayne PM, Liu JP. Determining the safety and effectiveness of Tai Chi: a critical overview of 210 systematic reviews of controlled clinical trials. *Systematic Reviews* 2022.

|                  |   |   |    |    |   |   |    |   |    |   |   |   |   |   |   |   |                               |
|------------------|---|---|----|----|---|---|----|---|----|---|---|---|---|---|---|---|-------------------------------|
| Zhang 2020 [102] | Y | N | PY | PY | Y | Y | N  | Y | Y  | N | Y | N | Y | Y | Y | N | Low ( <i>Critically low</i> ) |
| Zheng 2015 [103] | Y | N | N  | PY | Y | Y | Y  | Y | Y  | N | Y | Y | Y | Y | Y | Y | Low ( <i>Critically low</i> ) |
| Zheng 2016 [104] | Y | Y | PY | PY | Y | Y | PY | Y | Y  | N | Y | Y | Y | N | Y | Y | Moderate ( <i>Low</i> )       |
| Zhong 2020 [105] | Y | Y | PY | Y  | Y | Y | Y  | Y | Y  | Y | Y | Y | Y | Y | Y | Y | High                          |
| Zhou 2019 [106]  | Y | N | PY | PY | Y | Y | N  | Y | PY | N | Y | Y | N | Y | Y | Y | Critically low                |

**Y**, yes; **N**, no; **PY**, partial yes; **n/a**, not applicable. \***Modified AMSTAR 2 RATING** (see criteria below) \*\***AMSTAR 2 RATING** if item 7 is deemed a critical item according to Shea et al. [36] and no concessions are given for SRs published before 2019.

<sup>a</sup> Dong 2020 [67], excluded studies from the meta-analyses to reduce statistical heterogeneity. This is not recommended except as a sensitivity analysis. Also, there was no information about the potential causes of the heterogeneity or how excluding these studies impacted the estimates of effect.

<sup>b</sup> Huang 2020 [73], meta-analysis of falls risk reported Risk Ratios rather than Rate Ratios. No concerns with meta-analyses of falls risk factor outcomes.

<sup>c</sup> Liu F 2020 [78], pooled the results of RCTs and NRSIs without a rationale or any subgroup/sensitivity analysis.

<sup>d</sup> Liu WJ 2020 [80] and Yu 2019 [101], probable data extraction/transformation errors.

### **Modified AMSTAR 2 rating criteria**

**Critical Items:** 2, 4, 9, 11, 13 and 15. **Non-critical Items:** 1, 3, 5, 6, 7, 8, 10, 12, 14, 16.

**High quality:** No applicable critical flaws and no or one non-critical weakness

**Moderate quality:** No applicable critical flaws

**Low quality:** One applicable critical flaw with or without non-critical weaknesses

**Critically low quality:** More than one applicable critical flaw with or without non-critical weaknesses

Item 7 was deemed a non-critical item as this was only introduced to the revised PRISMA 2020 statement that was published in early 2021 [34]. For SRs published before 2019, item 7 was not downrated if they met the 2009 PRISMA reporting standards for excluded articles (Preferred Reporting Items for Systematic Reviews and Meta-analyses) statement reporting standards [38] as this item was introduced in late September 2017.

Item 3 was rated as PY when the SR only included RCTs and/or quasi-RCTs and as such it could be “inferred from what the authors actually wrote” that the rationale for the study design inclusion/exclusion criteria was to provide the most reliable and complete summary of the effects. Item 3 was rated N when other NRSI study designs were included, and no rationale was provided and could it not be “inferred from a careful reading of the complete study report”.
