# Supplementary material for: Determining the safety and effectiveness of Tai Chi: a critical overview of 210 systematic reviews of controlled clinical trials
Source: PubMed Central journal article supplement (PMC9719113; doi:10.1186/s13643-022-02100-5), 2022-12-03
Supplement: 13643_2022_2100_MOESM6_ESM.pdf [file 13643_2022_2100_MOESM6_ESM.pdf]

## Additional file 6: GRADE appraisal of the certainty of the evidence

| Study ID        | Outcome                                                            | Estimate of effect (95% CI) | Risk of bias | Inconsistency ( <i>sensitivity analysis</i> ) | Indirectness | Imprecision ( <i>sensitivity analysis</i> ) | Publication Bias | Evidence Certainty* ( <i>sensitivity analysis</i> ) |
|-----------------|--------------------------------------------------------------------|-----------------------------|--------------|-----------------------------------------------|--------------|---------------------------------------------|------------------|-----------------------------------------------------|
| Cheng 2019 [61] | Fibromyalgia impact questionnaire 12-16 weeks (4 RCTs)             | SMD -0.61 (-0.90 to -0.31)  | serious      | not serious                                   | not serious  | not serious ( <i>serious</i> )              | not serious      | MODERATE ( <i>LOW</i> )                             |
|                 | FIQ 24-32 weeks (2 RCTs)                                           | SMD -0.49 (-1.56 to 0.58)   | serious      | serious                                       | not serious  | very serious                                | not serious      | VERY LOW                                            |
|                 | Pain PROMs (3 RCTs)                                                | SMD -0.88 (-1.58 to -0.18)  | serious      | serious                                       | not serious  | serious                                     | not serious      | VERY LOW                                            |
| Choo 2020 [62]  | QoL - physical PROMs (6 RCTs)                                      | SMD 0.46 (0.13 to 0.80)     | serious      | not serious                                   | not serious  | not serious                                 | not serious      | MODERATE                                            |
|                 | QoL - mental health PROMs (6 RCTs)                                 | SMD 0.21 (0.03 to 0.39)     | serious      | not serious                                   | not serious  | not serious                                 | not serious      | MODERATE                                            |
|                 | Depressive symptoms (5 RCTs)                                       | SMD -0.42 (-0.84 to -0.01)  | serious      | serious                                       | not serious  | not serious                                 | not serious      | LOW                                                 |
|                 | Time up and go (5 RCTs)                                            | MD -0.2 (-0.66 to 0.26)     | serious      | not serious                                   | not serious  | not serious ( <i>serious</i> )              | not serious      | MODERATE ( <i>LOW</i> )                             |
| Cui 2019 [64]   | Serious adverse events - AE (TC vs active interventions) (15 RCTs) | RD 0.0 (-0.02 to 0.02)      | not serious  | not serious                                   | not serious  | very serious                                | not serious      | LOW                                                 |
|                 | Non-serious AE (TC vs active interventions) (15 RCTs)              | RD 0.01 (-0.01 to 0.03)     | not serious  | not serious                                   | not serious  | serious                                     | not serious      | MODERATE                                            |
|                 | TC related AE (TC vs active interventions) (15 RCTs)               | RD 0.0 (-0.01 to 0.02)      | not serious  | not serious                                   | not serious  | serious                                     | not serious      | MODERATE                                            |
|                 | Serious AE (TC vs inactive interventions) (9 RCTs)                 | RD -0.03 (-0.06 to 0.00)    | not serious  | not serious                                   | not serious  | serious                                     | not serious      | MODERATE                                            |
|                 | Non-serious AE (TC vs inactive interventions) (9 RCTs)             | RD 0.03 (-0.00 to 0.07)     | not serious  | not serious                                   | not serious  | serious                                     | not serious      | MODERATE                                            |
|                 | TC related AE (TC vs inactive interventions) (9 RCTs)              | RD 0.0 (-0.01 to 0.02)      | not serious  | not serious                                   | not serious  | serious                                     | not serious      | MODERATE                                            |
| Gu 2017 [66]    | 6-minute walk test (10 RCTs)                                       | MD 51 (30.49 to 71.5)       | very serious | serious                                       | not serious  | not serious                                 | not serious      | VERY LOW                                            |
|                 | Minnesota Living with Heart Failure Questionnaire - MLHFQ (8 RCTs) | MD -10.4 (-14.4 to -6.3)    | very serious | serious                                       | not serious  | not serious                                 | not serious      | VERY LOW                                            |
|                 | Left ventricular ejection fraction (7 RCTs)                        | MD 7.7 (3.6 to 11.9)        | very serious | serious                                       | not serious  | not serious                                 | not serious      | VERY LOW                                            |
| Guo 2020 [67]   | Forced expiratory volume in 1 second - FEV1 (3 RCTs)               | MD 0.13 (0.06 to 0.20)      | serious      | not serious                                   | not serious  | not serious ( <i>serious</i> )              | not serious      | MODERATE ( <i>LOW</i> )                             |

Yang GY, Hunter J, Bu FL, Hao WL, Zhang H, Wayne PM, Liu JP. Determining the safety and effectiveness of Tai Chi: a critical overview of 210 systematic reviews of controlled clinical trials. *Systematic Reviews* 2022.

|                      |                                                                                  |                              |              |              |             |              |             |                        |
|----------------------|----------------------------------------------------------------------------------|------------------------------|--------------|--------------|-------------|--------------|-------------|------------------------|
|                      | FEV1 (5 RCTs)                                                                    | MD 0.06 (-0.01 to 0.14)      | serious      | not serious  | not serious | serious      | not serious | LOW                    |
|                      | 6-minute walk time - 6-MWT (TC vs control) (6 RCTs)                              | MD 24.3 (6.3 to 42.3)        | serious      | serious      | not serious | serious      | not serious | LOW                    |
|                      | 6MWT (TC vs exercise) (6 RCTs)                                                   | MD 7.5 (2.1 to 12.3)         | serious      | not serious  | not serious | serious      | not serious | (VERY LOW)<br>MODERATE |
|                      | St George Respiratory Questionnaire - SGRQ (TC vs control) (3 RCTs)              | MD -8.7 (-14.6 to -2.7)      | serious      | not serious  | not serious | serious      | not serious | MODERATE               |
|                      | SGRQ (TC vs exercise) (4 RCTs)                                                   | MD -1.9 (-4.6 to 0.7)        | serious      | not serious  | not serious | serious      | not serious | (LOW)<br>MODERATE      |
| Hall 2017 [68]       | Pain SF-36 15 weeks (1 RCTs)                                                     | SMD -1.85 (-2.73 to -0.97)   | very serious | not serious  | not serious | very serious | not serious | VERY LOW               |
| Hu 2020 [70]         | Western Ontario and McMaster Universities Arthritis Index - WOMAC pain (14 RCTs) | SMD -0.69 (-0.95 to -0.44)   | serious      | not serious  | not serious | not serious  | not serious | MODERATE               |
|                      | WOMAC stiffness (12 RCTs)                                                        | SMD -0.65 (-0.98 to -0.33)   | serious      | serious      | not serious | not serious  | not serious | LOW                    |
|                      | WOMAC physical function (13 RCTs)                                                | SMD -0.92 (-1.16 to -0.69)   | serious      | not serious  | not serious | serious      | not serious | MODERATE               |
|                      | QoL mental health, SF-36 (5 RCTs)                                                | SMD 0.26 (0.06 to 0.45)      | serious      | not serious  | not serious | not serious  | not serious | MODERATE               |
|                      | QoL physical, SF-36 (5 RCTs)                                                     | SMD 0.48 (0.28 to 0.68)      | serious      | not serious  | not serious | not serious  | not serious | MODERATE               |
|                      | Arthritis self-efficacy scale (4 RCTs)                                           | SMD 0.27 (0.06 to 0.48)      | serious      | not serious  | not serious | serious      | not serious | MODERATE               |
| Huang 2017 [73]      | Rate of people who fell (no. of fallers) (16 RCTs)                               | RR 0.80 (0.72 to 0.88)       | not serious  | not serious  | not serious | not serious  | not serious | MODERATE               |
|                      | Incidence of falls (no. falls) (15 RCTs)                                         | RR 0.69 (0.60 to 0.80)       | not serious  | not serious  | not serious | not serious  | not serious | MODERATE               |
| Huang 2020 [71]      | Single Leg Stance (8 RCTs)                                                       | MD 5.8 (0.62 to 10.90)       | serious      | very serious | not serious | not serious  | not serious | VERY LOW               |
|                      | Berg balance scale (4 RCTs)                                                      | MD 1.0 (0.2 to 1.9)          | serious      | not serious  | not serious | not serious  | not serious | MODERATE               |
|                      | Time up and go (6 RCTs)                                                          | MD -0.71 (-0.88 to -0.54)    | serious      | not serious  | not serious | not serious  | not serious | MODERATE               |
| Jiang 2018 [74]      | VO2max (4 RCTs)                                                                  | SMD 2.2 (0.81 to 3.63)       | very serious | serious      | not serious | not serious  | not serious | VERY LOW               |
| Kruisbrink 2020 [75] | Fear of falling (6 RCTs)                                                         | SMD.B -1.05 (-1.60 to -0.50) | very serious | serious      | not serious | not serious  | not serious | VERY LOW               |
| Luo 2020 [79]        | Pain, 3 weeks (2 RCTs)                                                           | SMD 0.25 (-0.02 to 0.51)     | serious      | not serious  | not serious | serious      | not serious | LOW                    |

Yang GY, Hunter J, Bu FL, Hao WL, Zhang H, Wayne PM, Liu JP. Determining the safety and effectiveness of Tai Chi: a critical overview of 210 systematic reviews of controlled clinical trials. *Systematic Reviews* 2022.

|                  |                                                                    |                            |              |             |             |                        |             |                |
|------------------|--------------------------------------------------------------------|----------------------------|--------------|-------------|-------------|------------------------|-------------|----------------|
|                  | Pain, 12 weeks (4 RCTs)                                            | SMD 0.3 (0.08 to 0.51)     | serious      | not serious | not serious | not serious            | not serious | MODERATE (LOW) |
| Liu LZ 2020 [77] | Fatigue (TC vs control) 3 months (2 RCTs)                          | MD -0.46 (-1.09 to 0.17)   | serious      | not serious | not serious | serious                | not serious | LOW            |
|                  | Fatigue (TC vs control) 6 months (2 RCTs)                          | MD -0.16 (-0.98 to 0.67)   | serious      | not serious | not serious | serious                | not serious | LOW            |
|                  | Fatigue (TC+Ucare/Rehab vs Ucare/Rehab) 3 months (2 RCTs)          | SMD -0.91 (-1.30 to -0.53) | serious      | not serious | not serious | serious                | not serious | LOW            |
| Lyu 2018 [81]    | Activities of daily living - Barther Index (2 RCTs)                | MD 9.9 (6.8 to 13.0)       | serious      | not serious | not serious | serious                | not serious | LOW            |
|                  | Fugl-Meyer Assessment FMA - lower extremity (3 RCTs)               | MD 2.8 (0.95 to 4.56)      | serious      | serious     | not serious | serious                | not serious | VERY LOW       |
|                  | FMA - upper extremity (2 RCTs)                                     | MD 8.3 (4.7 to 11.8)       | serious      | not serious | not serious | serious                | not serious | LOW            |
|                  | FMA - all four limb (2 RCTs)                                       | MD 4.5 (1.9 to 7.1)        | serious      | not serious | not serious | serious                | not serious | LOW            |
|                  | Berg Balance Scale (2 RCTs)                                        | MD 5.2 (3.4 to 7.1)        | serious      | not serious | not serious | serious                | not serious | LOW            |
|                  | Time up and go (4 RCTs)                                            | MD 2.6 (1.8 to 3.4)        | serious      | not serious | not serious | serious                | not serious | LOW            |
| Lyu 2020 [80]    | Depression (6 RCTs)                                                | SMD 0.36 (0.10 to 0.61)    | very serious | not serious | not serious | not serious            | not serious | LOW            |
| Mudano 2019 [82] | Pain, Visual Analog Scale, 12 weeks (2 RCTs)                       | SMD -0.95 (-1.41 to -0.49) | very serious | not serious | not serious | very serious (serious) | not serious | VERY LOW       |
|                  | Disease activity, DAS-28-ESR, 12 weeks (1 RCTs)                    | MD -0.40 (-1.10 to 0.30)   | very serious | not serious | not serious | very serious (serious) | not serious | VERY LOW       |
|                  | Function, Health Assessment Questionnaire - HAQ, 12 weeks (2 RCTs) | MD -0.33 (-0.79 to 0.12)   | very serious | serious     | not serious | very serious (serious) | not serious | VERY LOW       |
| Ni 2019 [83]     | QoL physical domain (9 RCTs)                                       | SMD 0.34 (0.09 to 0.59)    | very serious | not serious | not serious | not serious            | not serious | LOW            |
|                  | QoL psychological Domain (9 RCTs)                                  | SMD 0.60 (0.12 to 1.08)    | very serious | serious     | not serious | not serious            | not serious | VERY LOW       |
|                  | QoL social relationship domain (8 RCTs)                            | SMD 0.26 (0.25 to 0.77)    | very serious | serious     | not serious | not serious            | not serious | VERY LOW       |
|                  | Sleep quality (3 RCTs)                                             | SMD 0.26 (-0.02 to 0.53)   | very serious | serious     | not serious | serious                | not serious | VERY LOW       |
| Pan 2016 [84]    | Total Cholesterol (6 RCTs)                                         | MD -7.7 (-17.3 to 1.4)     | serious      | serious     | not serious | serious                | not serious | VERY LOW       |
|                  | Triglycerides (6 RCTs)                                             | MD -16.8 (-31.3 to -2.4)   | serious      | not serious | not serious | not serious            | not serious | MODERATE       |

Yang GY, Hunter J, Bu FL, Hao WL, Zhang H, Wayne PM, Liu JP. Determining the safety and effectiveness of Tai Chi: a critical overview of 210 systematic reviews of controlled clinical trials. *Systematic Reviews* 2022.

|                         |                                                              |                            |              |              |             |                                 |             |                         |
|-------------------------|--------------------------------------------------------------|----------------------------|--------------|--------------|-------------|---------------------------------|-------------|-------------------------|
|                         | High-density lipoprotein cholesterol (5 RCTs)                | MD 0.46 (-0.71 to 1.64)    | serious      | not serious  | not serious | not serious ( <i>serious</i> )  | not serious | MODERATE ( <i>LOW</i> ) |
|                         | Low density lipoprotein cholesterol (4 RCTs)                 | MD -1.61 (-16.25 to 13.02) | serious      | very serious | not serious | serious ( <i>very serious</i> ) | not serious | VERY LOW                |
| Qin 2019 [85]           | Pain VAS 1-10 scale (TC vs control) (3 RCTs)                 | MD -1.2 (-2.3 to -1.1)     | serious      | serious      | not serious | serious ( <i>serious</i> )      | not serious | LOW ( <i>VERY LOW</i> ) |
|                         | Pain VAS 1-10 scale (TC + usual care vs usual care) (5 RCTs) | MD -1.1 (-1.3 to -0.9)     | serious      | not serious  | not serious | serious                         | not serious | MODERATE                |
| Si 2020 [86]            | Pittsburgh Sleep Quality Index - PSQI, healthy (10 RCTs)     | SMD -0.68 (-1.06 to -0.31) | serious      | serious      | not serious | serious                         | not serious | LOW                     |
|                         | PSQI, chronic disease (15 RCTs)                              | SMD -0.39 (-0.74 to -0.05) | serious      | serious      | not serious | serious                         | not serious | LOW                     |
| Song 2018 [87]          | Cancer related fatigue, lung cancer <8 weeks (2 RCTs)        | SMD -0.5 (-0.83 to -0.18)  | very serious | not serious  | not serious | serious                         | not serious | VERY LOW                |
|                         | Cancer related fatigue, prostate cancer <8 weeks (1 RCTs)    | SMD 0.01 (-0.51 to 0.52)   | very serious | not serious  | not serious | very serious                    | not serious | VERY LOW                |
| Su 2020 [88]            | knee extensor muscle strength (60°/sec) (2 RCTs)             | MD 17.5 (-12.0 to 47.0)    | serious      | serious      | not serious | very serious ( <i>serious</i> ) | not serious | VERY LOW                |
|                         | Knee flexor muscle strength (60°/sec) (2 RCTs)               | MD 22.1 (1.1 to 43.2)      | serious      | not serious  | not serious | very serious ( <i>serious</i> ) | not serious | VERY LOW ( <i>LOW</i> ) |
|                         | Knee flexor muscle strength 1-RM (2 RCTs)                    | MD 3.3 (2.1 to 4.4)        | serious      | not serious  | not serious | serious                         | not serious | LOW                     |
|                         | Knee extensor muscle strength 1-RM (4 RCTs)                  | MD 0.90 (0.34 to 1.45)     | serious      | not serious  | not serious | serious ( <i>serious</i> )      | not serious | MODERATE ( <i>LOW</i> ) |
| Taylor-Piliae 2020 [90] | QoL mental health PROMs, hypertension (3 RCTs)               | SMD 0.13 (NI)              | not serious  | not serious  | not serious | serious                         | not serious | MODERATE                |
|                         | QoL physical PROMs, hypertensive (3 RCTs)                    | SMD 0.47 (NI)              | not serious  | not serious  | not serious | not serious                     | not serious | HIGH                    |
|                         | Psychological distress, chronic heart failure (2 RCTs)       | SMD -0.58 (-0.95 to -0.22) | not serious  | not serious  | not serious | serious                         | not serious | MODERATE                |
| Wang 2020 [91]          | QoL general, PROMs (6 RCTs)                                  | SMD 1.23 (0.56 to 1.89)    | serious      | serious      | not serious | serious                         | not serious | LOW                     |
|                         | QoL physical, SF-36 (3 RCTs)                                 | MD 5.9 (1.1 to 10.8)       | serious      | serious      | not serious | serious ( <i>serious</i> )      | not serious | LOW ( <i>VERY LOW</i> ) |
|                         | QoL psychological, SF-36 (3 RCTs)                            | MD 2.2 (-1.2 to 5.6)       | serious      | not serious  | not serious | serious                         | not serious | LOW                     |
| Wang 2010 [93]          | Stress PROMs (4 RCTs)                                        | SMD 0.97 (0.06 to 1.87)    | very serious | very serious | not serious | serious ( <i>serious</i> )      | not serious | VERY LOW                |
|                         | Mood / affect PROMs (2 RCTs)                                 | SMD 0.25 (-0.04 to 0.53)   | very serious | not serious  | not serious | serious                         | not serious | VERY LOW                |

Yang GY, Hunter J, Bu FL, Hao WL, Zhang H, Wayne PM, Liu JP. Determining the safety and effectiveness of Tai Chi: a critical overview of 210 systematic reviews of controlled clinical trials. *Systematic Reviews* 2022.

|                 |                                                           |                            |              |             |             |             |             |                 |
|-----------------|-----------------------------------------------------------|----------------------------|--------------|-------------|-------------|-------------|-------------|-----------------|
| Wayne 2014 [94] | Executive function (Tai Chi vs inactive control) (4 RCTs) | SMD 0.90 (0.03 to 1.78)    | not serious  | serious     | not serious | not serious | not serious | MODERATE        |
|                 | Executive function (TC vs exercise) (2 RCTs)              | SMD 0.51 (0.17 to 0.85)    | not serious  | not serious | not serious | serious     | not serious | MODERATE        |
| Wang 2017 [92]  | Physical function SF-36 (4 RCTs)                          | MD -1.8 (-5.2 to 1.6)      | serious      | not serious | not serious | serious     | not serious | LOW             |
|                 | Bodily pain SF-36 (3 RCTs)                                | MD -3.6 (-6.6 to -0.6)     | serious      | not serious | not serious | serious     | not serious | MODERATE (LOW)  |
|                 | General health SF-36 (3 RCTs)                             | MD -5.1 (-7.6 to -2.6)     | serious      | not serious | not serious | serious     | not serious | MODERATE (LOW)  |
|                 | Vitality SF-36 (3 RCTs)                                   | MD -5.7 (-8.5 to -2.8)     | serious      | not serious | not serious | serious     | not serious | MODERATE (LOW)  |
|                 | Mental health SF-36 (4 RCTs)                              | MD -2.5 (-4.8 to -0.2)     | serious      | not serious | not serious | serious     | not serious | MODERATE (LOW)  |
|                 | Social function SF-36 (3 RCTs)                            | MD -2.2 (-5.0 to 0.6)      | serious      | not serious | not serious | serious     | not serious | LOW             |
| Wu 2020 [96]    | 6-minute walk time (5 RCTs)                               | SMD 1.3 (0.50 to 2.11)     | serious      | serious     | not serious | not serious | not serious | LOW             |
|                 | Left ventricular ejection fraction (5 RCTs)               | SMD 1.0 (0.43 to 1.57)     | serious      | serious     | not serious | not serious | not serious | LOW             |
| Xiang 2017 [97] | Fatigue PROMs (10 RCTs)                                   | SMD -0.45 (-0.70 to -0.20) | serious      | not serious | not serious | not serious | not serious | MODERATE        |
|                 | Vitality PROMs (4 RCTs)                                   | SMD 0.63 (0.20 to 1.07)    | very serious | not serious | not serious | not serious | not serious | LOW             |
|                 | Sleep PROMs (3 RCTs)                                      | SMD -0.32 (-0.61 to -0.04) | very serious | not serious | not serious | not serious | not serious | LOW (VERY LOW)  |
|                 | Depression PROMs (7 RCTs)                                 | SMD -0.58 (-1.04 to -0.11) | very serious | serious     | not serious | not serious | not serious | VERY LOW        |
| Yin 2014 [98]   | Depression scales (25 RCTs)                               | SMD 0.36 (0.19 to 0.53)    | not serious  | not serious | not serious | not serious | not serious | HIGH            |
|                 | Anxiety scales (11 RCTs)                                  | SMD 0.34 (0.02 to 0.66)    | not serious  | serious     | not serious | not serious | not serious | MODERATE        |
| Yu 2018 [100]   | Unified Parkinson's Disease Rating III: Motor (8 RCTs)    | MD -3.7 (-5.7 to -1.7)     | not serious  | serious     | not serious | not serious | not serious | MODERATE        |
|                 | Time up and go (7 RCTs)                                   | SMD -0.5 (-0.88 to -0.11)  | not serious  | not serious | not serious | not serious | not serious | HIGH            |
|                 | Berg balance scale (6 RCTs)                               | SMD 0.85 (0.44 to 1.27)    | not serious  | not serious | not serious | not serious | not serious | HIGH (MODERATE) |
|                 | Parkinson's Disease Questionnaire (3 RCTs)                | SMD -0.75 (-1.45 to -0.04) | not serious  | not serious | not serious | not serious | not serious | HIGH (MODERATE) |

Yang GY, Hunter J, Bu FL, Hao WL, Zhang H, Wayne PM, Liu JP. Determining the safety and effectiveness of Tai Chi: a critical overview of 210 systematic reviews of controlled clinical trials. *Systematic Reviews* 2022.

|                     |                                                                                     |                                             |             |             |             |              |             |                   |
|---------------------|-------------------------------------------------------------------------------------|---------------------------------------------|-------------|-------------|-------------|--------------|-------------|-------------------|
| Zhang 2019<br>[101] | Spine bone mineral density - BMD (6 RCTs)                                           | MD 0.04 g/cm <sup>2</sup><br>(0.02 to 0.06) | serious     | not serious | not serious | not serious  | not serious | MODERATE<br>(LOW) |
|                     | Femur BMD (3 RCTs)                                                                  | MD 0.04 g/cm <sup>2</sup><br>(0.01 to 0.06) | serious     | not serious | not serious | serious      | serious     | LOW               |
|                     | Spine BMD (2 RCTs)                                                                  | MD 0.16 g/cm <sup>2</sup><br>(0.09 to 0.23) | serious     | not serious | not serious | serious      | serious     | LOW               |
|                     | Femur BMD (2 RCTs)                                                                  | MD 0.16 g/cm <sup>2</sup><br>(0.04 to 0.29) | serious     | serious     | not serious | serious      | serious     | VERY LOW          |
| Zhang 2020<br>[102] | Global cognitive function (5 RCTs)                                                  | MD 0.29 (-0.61 to<br>0.74)                  | not serious | not serious | not serious | not serious  | not serious | HIGH              |
|                     | Memory - Delayed Recall Test (4 RCTs)                                               | MD 0.37 (0.13 to<br>0.61)                   | not serious | not serious | not serious | not serious  | not serious | HIGH              |
|                     | Performance - Digit Span Test (4 RCTs)                                              | MD 0.03 (-0.16 to<br>0.22)                  | not serious | not serious | not serious | not serious  | not serious | HIGH              |
| Zheng 2015<br>[103] | Incidence of nonfatal stroke over 1 - 2 years (2 RCTs)                              | RR 0.11 (0.01 to<br>0.85)                   | serious     | not serious | not serious | serious      | serious     | LOW               |
|                     | Incidence of fatal stroke over 1 - 2 years (2 RCTs)                                 | RR 0.33 (0.05 to<br>2.05)                   | serious     | not serious | not serious | serious      | serious     | LOW<br>(VERY LOW) |
| Zheng 2016<br>[104] | Negative symptoms - Positive and Negative Syndrome Scale and Scale - PANSS (6 RCTs) | SMD -0.87 (-1.51 to<br>-0.24)               | serious     | serious     | not serious | not serious  | not serious | LOW               |
|                     | Positive symptoms - PANSS (5 RCTs)                                                  | SMD -0.09 (-0.44 to<br>0.26)                | serious     | not serious | not serious | not serious  | not serious | MODERATE<br>(LOW) |
|                     | Discontinuation rate (4 RCTs)                                                       | RR 0.06 (0.23 to<br>1.40)                   | serious     | not serious | not serious | very serious | not serious | VERY LOW          |
| Zhou 2019<br>[106]  | Glycosylated haemoglobin - HbA1c % (14 RCTs)                                        | MD -0.88 (-1.45 to -<br>0.31)               | serious     | serious     | not serious | not serious  | not serious | LOW               |
|                     | Systolic blood pressure (5 RCTs)                                                    | MD -10.0 mmHg (-<br>15.8 to -4.3)           | serious     | not serious | not serious | not serious  | not serious | MODERATE<br>(LOW) |
|                     | Diastolic blood pressure (5 RCTs)                                                   | MD -4.9 mmHg (-8.2<br>to -1.5)              | serious     | not serious | not serious | not serious  | not serious | MODERATE<br>(LOW) |
|                     | QoL physical function (5 RCTs)                                                      | MD 7.1 (0.79 to<br>13.4)                    | serious     | serious     | not serious | not serious  | not serious | LOW<br>(VERY LOW) |
|                     | QoL bodily pain (5 RCTs)                                                            | MD 4.3 (0.8 to 7.8)                         | serious     | not serious | not serious | not serious  | not serious | MODERATE<br>(LOW) |
| Zhong 2020<br>[105] | Systolic blood pressure - SBP (TC vs inactive control) (9 RCTs)                     | MD -14.8 (-19.6 to -<br>10.0)               | serious     | serious     | not serious | not serious  | not serious | LOW               |
|                     | Diastolic blood pressure - DBP (TC vs inactive control) (9 RCTs)                    | MD -7.0 (-9.1 to -<br>5.0)                  | serious     | not serious | not serious | not serious  | not serious | MODERATE          |
|                     | SBP (TC vs exercise) (5 RCTs)                                                       | MD -7.9 (-14.2 to -<br>1.7)                 | serious     | serious     | not serious | not serious  | not serious | LOW<br>(VERY LOW) |

Yang GY, Hunter J, Bu FL, Hao WL, Zhang H, Wayne PM, Liu JP. Determining the safety and effectiveness of Tai Chi: a critical overview of 210 systematic reviews of controlled clinical trials. *Systematic Reviews* 2022.

|                               |                         |         |             |             |             |             |                |
|-------------------------------|-------------------------|---------|-------------|-------------|-------------|-------------|----------------|
| DBP (TC vs exercise) (5 RCTs) | MD -3.9 (-6.5 to -1.2)  | serious | not serious | not serious | not serious | not serious | MODERATE (LOW) |
| SBP (medication) 15 RCTs)     | MD -9.1 (-14.0 to -4.1) | serious | serious     | not serious | not serious | not serious | LOW            |
| DBP (medication) (15 RCTs)    | MD -5.6 (-14.0 to -4.1) | serious | serious     | not serious | not serious | not serious | LOW            |

**CI:** confidence interval, **RD:** risk difference, **MD:** mean difference, **MID:** minimally important difference, **SMD:** standardised mean difference, **SMD.B:** regression co-efficient for standardised mean difference, **AE:** adverse effects, **6MWT:** 6-minute walk distance/test, **BMD:** bone mineral density, **BP:** blood pressure, **PANSS:** positive and negative syndrome scale, **Rehab:** rehabilitation programs, **Ucare:** usual care, conventional treatment, standard medical care, **TC:** Tai Chi; **RCTs:** Randomized controlled trials, **QoL:** Quality of Life

\* **GRADE RUBRIC** summary of specific thresholds, ranges and criteria used for the assessments

### 1. Risk of bias (RoB)

**Overall assessment of RoB: Low RoB:** ≥75% RCTs in the SR were assessed as low RoB in all three categories - randomisation/selection bias, assessor blinding, and missing data; OR if no information (NI) about the categories, ≥75% RCTs were rated overall as low RoB; **Moderate RoB:** ≥75% RCTs were assessed as low RoB in one or two categories - randomisation, assessor blinding, and missing data; OR if NI about categories, ≥75% RCTs were rated overall as moderate RoB; **High RoB:** <75% RCTs were assessed overall as low RoB in all three categories - randomisation, assessor blinding, and missing data; OR if NI about categories <75% RCTs were rated overall as low or moderate RoB.

- i. Very serious: high RoB & no sensitivity analysis or the effect estimate is unstable with sensitivity analysis.
- ii. Serious: high RoB, however, the effect estimate stable with sensitivity analysis when high RoB of RCTs excluded or only low RoB RCTs included; OR moderate RoB & no sensitivity analysis or the effect estimate is unstable with sensitivity analysis.
- iii. Not serious: low RoB; OR moderate RoB, however, the effect estimate is stable with sensitivity analysis when only low RoB of RCTs included.

NOTE: cut-off of 75% and the most important RoB categories - randomisation, assessor blinding - were informed by algorithm developed by Pollock et al. [40].

#### Risk of bias sensitivity analysis (not performed)

Alternate options for a sensitivity analysis such as incorporating more RoB domains or assessing the RoB for each estimate were not possible due to pragmatic constraints.

### 2. Inconsistency

- i. Very serious: very high heterogeneity ( $I^2 \geq 90\%$ ) & mixed direction of results, +/- appreciable non-overlap in CIs (confirm with visual inspection of Forest plot) or NI.
- ii. Serious: considerable heterogeneity  $I^2$  between 76% to 89%; OR  $I^2 \geq 90\%$ , however, all RCTs favour one direction & CIs mostly overlap or if subgroup/sensitivity analysis is indicated then reduces ( $I^2 \leq 75\%$ ) and estimate of effect is stable.
- iii. Not serious: no heterogeneity; OR acceptable heterogeneity ( $I^2 \leq 75\%$ ).

NOTE: heterogeneity cut off set at  $I^2 \leq 75\%$  as per algorithm developed by Pollock et al. [38]; subgroup analysis deemed unreliable or not indicated if <10 RCTs, and 'one-out' study sensitivity analysis unreliable if <6 RCTs.

#### Inconsistency sensitivity analysis

- i. Very serious: heterogeneity  $I^2 > 75\%$  & mixed direction of results +/- appreciable non-overlap in CIs; OR  $I^2 \geq 90\%$  and NI.
- ii. Serious: heterogeneity  $I^2 > 75\%$ , however, all RCTs favour one direction & CIs mostly overlap, or if subgroup/sensitivity analysis is indicated then reduces  $I^2 \leq 75\%$  with stable estimates of effects; OR  $I^2$  between 31-75% & mixed direction of results +/- appreciable non-overlap in CIs; OR NI.
- iii. Not serious: no heterogeneity; OR heterogeneity  $I^2 \leq 30\%$  and  $\tau^2$  test  $P > 0.1$ ; OR heterogeneity  $I^2$  between 31-75% and all RCTs favour Tai Chi, or CIs are overlapping, or subgroup/sensitivity analysis is indicated and  $I^2 \leq 40\%$  with stable estimates of effect.

NOTE: subgroup analysis deemed unreliable or not indicated if <10 RCTs, and 'one-out' study sensitivity analysis unreliable if <6 RCTs.

### 3. Indirectness

NOTE: all estimates of effect were assessed as 'not serious' as all participants, interventions and outcomes were directly relevant to the research question.

### 4. Imprecision

Yang GY, Hunter J, Bu FL, Hao WL, Zhang H, Wayne PM, Liu JP. Determining the safety and effectiveness of Tai Chi: a critical overview of 210 systematic reviews of controlled clinical trials. *Systematic Reviews* 2022.

**Optimum information size (OIS):** is met if trial sequential analysis conducted and information size is reached; otherwise for continuous data OIS is met if no. participants in meta-analysis  $\geq 200$ ; for relative/absolute risk OIS is met if  $>4,000$  participants & no. events  $>100$ , alternatively calculate OIS ( $\alpha = 0.05$ ;  $\beta = 0.02$ ; 25% RRR) or use Fig.4/5 in GRADE guidelines 5.2.4. to estimate OIS [33].

**Important benefit and harm included:** SMD  $\pm 0.5$ ; MD  $\pm$  minimal clinically important difference (MCID); OR/RR/HR  $<0.75$  and  $>1.25$ ; ARR treatment outcomes and non-serious AEs  $\pm 0.1$ ; ARR serious AEs  $\pm 0.01$ .

- i. Very serious: no. participants in meta-analysis of continuous data  $<100$ ; OR OIS is not met & 95%CI includes no effect and both important benefit and harm included.
- ii. Serious: OIS is not met & 95% CI excludes no effect; OR OIS is met, however, 95% CI includes no effect & important benefit or harm included.
- iii. Not serious: OIS is met & 95% CI excludes no effect; OR OIS is met, however, 95% CI includes no effect & important benefit and harm excluded.

NOTE: OIS cut offs of 100 and 200 for continuous data as per algorithm developed by Pollock et al. [40].

#### **Imprecision sensitivity analysis**

**Optimum information size (OIS):** is met as per above, except for continuous data OIS is met if no. participants in meta-analysis  $\geq 400$ .

**Important benefit and harm included:** is unchanged.

- i. Very serious: OIS is not met & 95% CI includes no effect and both important benefit and harm included.
- ii. Serious: OIS is not met & 95% CI excludes no effect; OR OIS is met, however, 95% CI includes no effect & important benefit or harm included.
- iii. Not serious: OIS is met & 95% CI excludes no effect; OR OIS is met, however, 95% CI includes no effect & important benefit and harm excluded.

NOTE: cut off for OIS met  $\geq 400$  for continuous data informed by GRADE [118].

#### **5. Publication bias**

- i. Serious: assessed as 'strongly suspected' based on funnel plot and/or statistical test; OR not assessed, however, assessed as 'strongly suspected' for another meta-analysis in the same systematic review; OR not assessed despite  $>10$  studies in the meta-analysis and at least half of the studies have a sample size  $<100$ .
- ii. Not serious: not assessable  $<10$  studies in the meta-analysis; OR assessed as not present or probably not present.

#### **Publication bias sensitivity analysis (not performed)**

Language bias was not assessed as studies published in languages other than English are more likely to report findings that favour traditional and complementary medicine interventions and may increase, rather than decrease funnel plot asymmetry [119] since they typically have small sample sizes [7].

## **REFERENCES**

118. Guyatt, G.H., et al., *GRADE guidelines 6. Rating the quality of evidence--imprecision*. J Clin Epidemiol, 2011. **64**(12): p. 1283-93.
119. Dobrescu, A.I., et al., *Restricting evidence syntheses of interventions to English-language publications is a viable methodological shortcut for most medical topics: a systematic review*. J Clin Epidemiol, 2021. **137**: p. 209-217.

Yang GY, Hunter J, Bu FL, Hao WL, Zhang H, Wayne PM, Liu JP. Determining the safety and effectiveness of Tai Chi: a critical overview of 210 systematic reviews of controlled clinical trials. *Systematic Reviews* 2022.
